# Supplementary material for: A single mutation in the 729 residue modulates human DNA topoisomerase IB DNA binding and drug resistance
Source: PubMed Central journal article supplement — Nucleic Acids Res. 2008 Sep 4;36(17):5635–44. doi: 10.1093/nar/gkn557 (PMC2553582; doi:10.1093/nar/gkn557), 2008-09-04
Supplement: gkn557_2.pdf [file gkn557_2.pdf]

**FIGURE 4S: Cleavage-religation equilibrium using equal activity of protein**

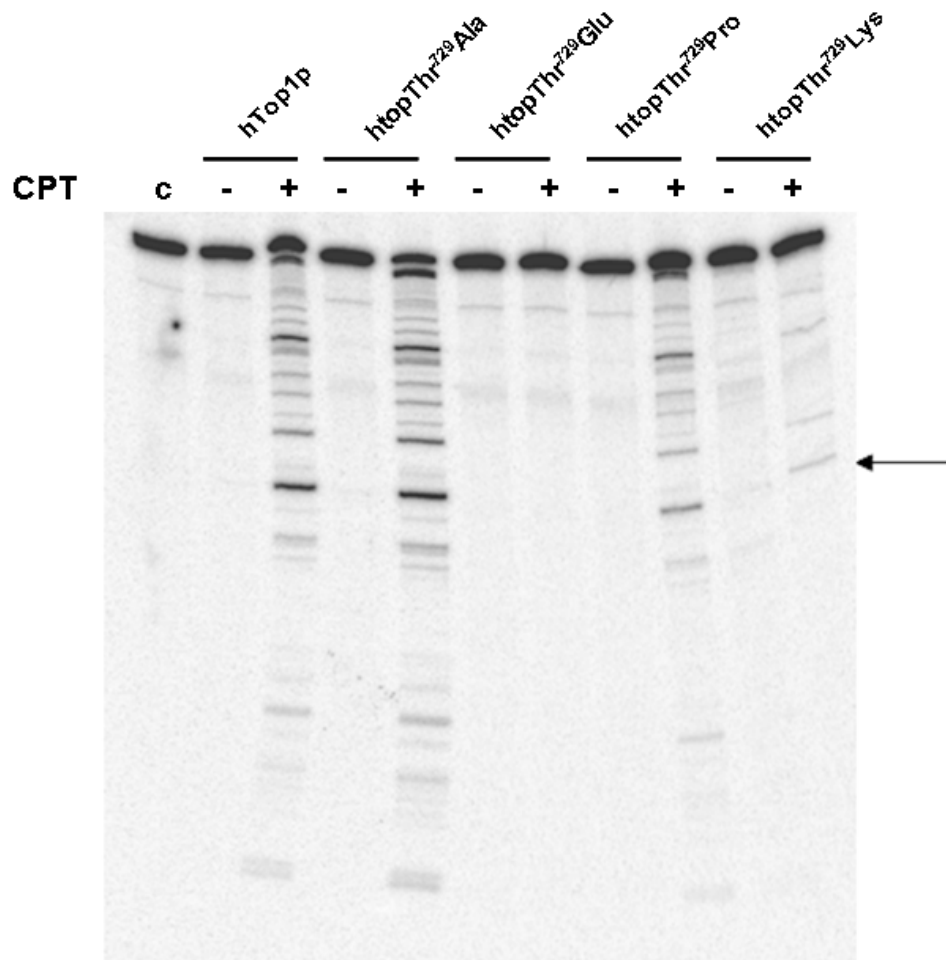

Equal activity of hTop1p, htop1Thr729Ala, htop1Thr729Pro, htop1Thr729Lys or htop1Thr729Glu were incubated with a single <sup>32</sup>P end-labeled DNA fragment in absence or presence of CPT as described in the Materials and Methods section. After 30 minutes the reactions were stopped with 0.5% SDS and the cleavage products resolved by Urea/PAGE. C indicates no enzyme control. The arrow indicates the position of a high affinity cleavage site.
